# Supplementary material for: Bimekizumab treatment in biologic DMARD-naïve patients with active psoriatic arthritis: 52-week efficacy and safety results from the phase III, randomised, placebo-controlled, active reference BE OPTIMAL study
Source: PubMed Central journal article supplement — Ann Rheum Dis. 2023 Sep 11;82(11):1404–14. doi: 10.1136/ard-2023-224431 (PMC10579478; doi:10.1136/ard-2023-224431), 2023-09-11
Supplement: ard-2023-224431supp001.pdf [file ard-2023-224431supp001.pdf]

1 **SUPPLEMENTARY APPENDIX**

2 **Supplementary Appendix 1**

3 UCB-Defined Opportunistic Infection

4

5 The definition of opportunistic infections used in this study was: infections caused by  
6 uncommon pathogens (e.g., pneumocystis jirovecii, cryptococcosis) or unusually  
7 severe infections caused by common pathogens (e.g. cytomegalovirus, herpes  
8 zoster).

9

10 A prespecified preferred term list of treatment-emergent adverse events (TEAEs)  
11 that would be considered opportunistic infections was referred to when classifying  
12 infections as opportunistic. Some TEAEs must have also been serious infections to be  
13 considered opportunistic infections; others were considered opportunistic infections  
14 regardless of seriousness. Some TEAEs must have also been evaluated on a case-by-  
15 case basis by the study physician to determine whether or not it was an  
16 opportunistic infection.

1 **Supplementary Table 1. Important protocol deviations from Week 16 to Week 52**

|                                               | <b>PBO/BKZ<br/>160 mg Q4W<br/>N=271</b> | <b>BKZ 160 mg Q4W<br/>N=414</b> | <b>Reference arm<br/>(ADA 40 mg Q2W)<br/>N=136</b> | <b>All patients<br/>N=821</b> |
|-----------------------------------------------|-----------------------------------------|---------------------------------|----------------------------------------------------|-------------------------------|
| Any important protocol deviation              | 10 (3.7)                                | 14 (3.4)                        | 5 (3.7)                                            | 29 (3.5)                      |
| Inclusion criteria deviation                  | 0                                       | 0                               | 0                                                  | 0                             |
| Exclusion criteria deviation                  | 0                                       | 0                               | 0                                                  | 0                             |
| Withdrawal criteria deviation                 | 0                                       | 0                               | 0                                                  | 0                             |
| Prohibited concurrent medication use          | 1 (0.4)                                 | 2 (0.5)                         | 0                                                  | 3 (0.4)                       |
| Incorrect treatment or dose                   | 0                                       | 1 (0.2)                         | 1 (0.7)                                            | 2 (0.2)                       |
| Treatment non-compliance                      | 0                                       | 0                               | 0                                                  | 0                             |
| Procedural non-compliance                     | 9 (3.3)                                 | 11 (2.7)                        | 2 (1.5)                                            | 22 (2.7)                      |
| COVID-19-related important protocol deviation | 0                                       | 1 (0.2)                         | 2 (1.5)                                            | 3 (0.4)                       |
| COVID-19 visit deviation                      | 0                                       | 1 (0.2)                         | 1 (0.7)                                            | 2 (0.2)                       |
| COVID-19 treatment deviation                  | 0                                       | 0                               | 1 (0.7)                                            | 1 (0.1)                       |
| COVID-19 termination                          | 0                                       | 0                               | 0                                                  | 0                             |
| COVID-19 other important protocol deviation   | 0                                       | 0                               | 0                                                  | 0                             |
| Number of patients excluded from PK-PPS       | 0                                       | 0                               | 0                                                  | 0                             |

2 Active treatment-blind set. Patients were summarised according to randomised treatment at baseline in the double-blind treatment period. Placebo-randomised patients  
3 switched to BKZ 160 mg Q4W at Week 16. Patients with important protocol deviations affecting the plasma concentration were excluded from the Pharmacokinetic Per  
4 Protocol Set. ADA: adalimumab; BKZ: bimekizumab; COVID-19: Coronavirus Disease 2019; PK-PPS: pharmacokinetic per protocol set; Q2W: every two weeks; Q4W: every  
5 four weeks.

6

1 **Supplementary Table 2. Change from baseline in ACR individual components**

2

| Component                                              | PBO<br>(Weeks 0–16)<br>N=281 | BKZ 160 mg Q4W<br>(Weeks 16–52)<br>N=281 | BKZ 160 mg Q4W<br>(Weeks 0–52)<br>N=431 |              | Reference arm<br>(ADA 40 mg Q2W; Weeks 0–52)<br>N=140 |              |
|--------------------------------------------------------|------------------------------|------------------------------------------|-----------------------------------------|--------------|-------------------------------------------------------|--------------|
|                                                        | Wk 16                        | Wk 52                                    | Wk 16                                   | Wk 52        | Wk 16                                                 | Wk 52        |
| SJC score change from baseline, <sup>a</sup> mean (SE) | -3.0 (0.5)                   | -7.8 (0.4)                               | -6.6 (0.3)                              | -7.6 (0.3)   | -7.5 (0.6)                                            | -8.2 (0.6)   |
| TJC score change from baseline, <sup>b</sup> mean (SE) | -3.1 (0.7)                   | -11.9 (0.7)                              | -10.0 (0.5)                             | -12.5 (0.5)  | -10.9 (1.0)                                           | -12.6 (0.9)  |
| HAQ-DI score change from baseline, mean (SE)           | -0.09 (0.03)                 | -0.38 (0.03)                             | -0.26 (0.02)                            | -0.34 (0.02) | -0.33 (0.04)                                          | -0.41 (0.05) |
| PtAAP score change from baseline, mean (SE)            | -6.2 (1.5)                   | -31.8 (1.8)                              | -23.6 (1.3)                             | -30.4 (1.4)  | -25.7 (2.5)                                           | -32.7 (2.5)  |
| PhGA-PsA score change from baseline, mean (SE)         | -12.6 (1.4)                  | -45.2 (1.2)                              | -37.4 (1.1)                             | -44.9 (1.0)  | -37.3 (2.0)                                           | -43.0 (2.0)  |
| PGA-PsA score change from baseline, mean (SE)          | -7.7 (1.6)                   | -35.2 (1.9)                              | -26.4 (1.3)                             | -33.2 (1.4)  | -26.9 (2.5)                                           | -32.9 (2.4)  |
| hs-CRP change from baseline, mean (SE)                 | -2.4 (1.0)                   | -6.7 (1.2)                               | -4.2 (0.6)                              | -4.1 (0.7)   | -3.9 (0.8)                                            | -3.2 (0.9)   |

3 Randomised set. [a] The SJC was based on a joint count of 66; [b] The TJC was based on a joint count of 68. ACR: American College of Rheumatology; ADA: adalimumab;  
4 BKZ: bimekizumab; HAQ-DI: Health Assessment Questionnaire-Disability Index; hs-CRP: high sensitivity C-reactive protein; PGA-PsA: Patient's Global Assessment of Psoriatic  
5 Arthritis; PhGA-PsA: Physician's Global Assessment of Psoriatic Arthritis; PtAAP: Patient's Assessment of Arthritis Pain; Q2W: every two weeks; Q4W: every four weeks; SE:  
6 standard error; SJC: swollen joint count; TJC: tender joint count.

1 **Supplementary Table 3. Fungal infections**

| AEs of Special Monitoring          | Up to Week 16, n (%)         |                                             |                                                              | Up to Week 52, n (%) [EAIR/100 PY]                             |                                                            |
|------------------------------------|------------------------------|---------------------------------------------|--------------------------------------------------------------|----------------------------------------------------------------|------------------------------------------------------------|
|                                    | PBO<br>N=281<br>(PYAR: 87.3) | BKZ 160 mg<br>Q4W<br>N=431<br>(PYAR: 134.2) | Reference Arm<br>(ADA 40 mg<br>Q2W)<br>N=140<br>(PYAR: 43.4) | BKZ 160 mg Q4W<br>Total<br>N=702 <sup>a</sup><br>(PYAR: 603.4) | Reference Arm<br>(ADA 40 mg Q2W)<br>N=140<br>(PYAR: 136.8) |
| Fungal Infections, n (%)           | 4 (1.4)                      | 20 (4.6)                                    | 1 (0.7)                                                      | 82 (11.7) [14.6]                                               | 2 (1.4) [1.5]                                              |
| <i>Candida</i> infections          | 2 (0.7)                      | 11 (2.6)                                    | 0                                                            | 54 (7.7) [9.3]                                                 | 1 (0.7) [0.7]                                              |
| Oral candidiasis                   | 0                            | 9 (2.1)                                     | 0                                                            | 38 (5.4) [6.5]                                                 | 1 (0.7) [0.7]                                              |
| Vulvovaginal candidiasis           | 2 (0.7)                      | 1 (0.2)                                     | 0                                                            | 8 (1.1) [1.3]                                                  | 0                                                          |
| Oesophageal candidiasis            | 0                            | 0                                           | 0                                                            | 4 (0.6) [0.7]                                                  | 0                                                          |
| Skin candida                       | 0                            | 1 (0.2)                                     | 0                                                            | 3 (0.4) [0.5]                                                  | 0                                                          |
| Oropharyngeal candidiasis          | 0                            | 0                                           | 0                                                            | 2 (0.3) [0.3]                                                  | 0                                                          |
| Recurrent candidiasis              | 0                            | 1 (0.2)                                     | 0                                                            | 12 (1.7)                                                       | 0                                                          |
| Fungal infections NEC              | 2 (0.7)                      | 9 (2.1)                                     | 0                                                            | 29 (4.1) [4.9]                                                 | 0                                                          |
| Fungal skin infection              | 0                            | 3 (0.7)                                     | 0                                                            | 10 (1.4) [1.7]                                                 | 0                                                          |
| Oral fungal infection              | 0                            | 2 (0.5)                                     | 0                                                            | 10 (1.4) [1.7]                                                 | 0                                                          |
| Vulvovaginal mycotic infection     | 2 (0.7)                      | 0                                           | 0                                                            | 7 (1.0) [1.2]                                                  | 0                                                          |
| Tongue fungal infection            | 0                            | 3 (0.7)                                     | 0                                                            | 3 (0.4) [0.5]                                                  | 0                                                          |
| Onychomycosis                      | 0                            | 1 (0.2)                                     | 0                                                            | 1 (0.1) [0.2]                                                  | 0                                                          |
| Oesophagitis fungal infection      | 0                            | 0                                           | 0                                                            | 1 (0.1) [0.2]                                                  | 0                                                          |
| Laryngitis fungal                  | 0                            | 0                                           | 0                                                            | 1 (0.1) [0.2]                                                  | 0                                                          |
| Upper respiratory fungal infection | 0                            | 0                                           | 0                                                            | 1 (0.1) [0.2]                                                  | 0                                                          |
| Tinea infections                   | 0                            | 0                                           | 1 (0.7)                                                      | 7 (1.0) [1.2]                                                  | 1 (0.7) [0.7]                                              |

| AEs of Special Monitoring                                  | Up to Week 16, n (%)         |                                             |                                                              | Up to Week 52, n (%) [EAIR/100 PY]                             |                                                            |
|------------------------------------------------------------|------------------------------|---------------------------------------------|--------------------------------------------------------------|----------------------------------------------------------------|------------------------------------------------------------|
|                                                            | PBO<br>N=281<br>(PYAR: 87.3) | BKZ 160 mg<br>Q4W<br>N=431<br>(PYAR: 134.2) | Reference Arm<br>(ADA 40 mg<br>Q2W)<br>N=140<br>(PYAR: 43.4) | BKZ 160 mg Q4W<br>Total<br>N=702 <sup>a</sup><br>(PYAR: 603.4) | Reference Arm<br>(ADA 40 mg Q2W)<br>N=140<br>(PYAR: 136.8) |
| Tinea versicolour                                          | 0                            | 0                                           | 1 (0.7)                                                      | 3 (0.4) [0.5]                                                  | 1 (0.7) [0.7]                                              |
| Tinea pedis                                                | 0                            | 0                                           | 0                                                            | 2 (0.3) [0.3]                                                  | 0                                                          |
| Body tinea                                                 | 0                            | 0                                           | 0                                                            | 1 (0.1) [0.2]                                                  | 0                                                          |
| Tinea infection                                            | 0                            | 0                                           | 0                                                            | 1 (0.1) [0.2]                                                  | 0                                                          |
| Serious <i>Candida</i> infections                          | 0                            | 0                                           | 0                                                            | 0                                                              | 0                                                          |
| Systemic <i>Candida</i> infections                         | 0                            | 0                                           | 0                                                            | 0                                                              | 0                                                          |
| <i>Candida</i> infections leading to study discontinuation | 0                            | 1 (0.2)                                     | 0                                                            | 1 (0.1) [0.2]                                                  | 0                                                          |

- 1 Safety set (Week 16) and active medication set for the overall study period (Week 52). [a] Includes patients who switched from placebo to BKZ (events after switch only).  
2 ADA: adalimumab; AE: adverse event; BKZ: bimekizumab; EAIR: exposure-adjusted incidence rate; NEC: not elsewhere classified; PY: patient-years; PYAR: patient-years at  
3 risk; Q2W: every two weeks; Q4W: every four weeks.

1 **Supplementary Table 4. Week 16–52 safety (active treatment-blind**  
 2 **period)**

|                                                | Week 16–52, n (%) [EAIR/100 PY]                             |                                                           |
|------------------------------------------------|-------------------------------------------------------------|-----------------------------------------------------------|
|                                                | BKZ 160 mg Q4W Total<br>N=685 <sup>a</sup><br>(PYAR: 467.0) | Reference Arm<br>(ADA 40 mg Q2W)<br>N=136<br>(PYAR: 93.1) |
| Any TEAE                                       | 489 (71.4) [206.4]                                          | 93 (68.4) [188.5]                                         |
| Serious TEAEs                                  | 39 (5.7) [8.6]                                              | 9 (6.6) [10.0]                                            |
| Study discontinuation due to adverse event     | 13 (1.9) [2.8]                                              | 4 (2.9) [4.4]                                             |
| Drug-related adverse event                     | 167 (24.4)                                                  | 37 (27.2)                                                 |
| Severe adverse events                          | 19 (2.8)                                                    | 7 (5.1)                                                   |
| Deaths                                         | 1 (0.1) <sup>b</sup>                                        | 0                                                         |
| Most frequent adverse events <sup>c</sup>      |                                                             |                                                           |
| Nasopharyngitis                                | 52 (7.6) [11.7]                                             | 6 (4.4) [6.7]                                             |
| Urinary tract infection                        | 35 (5.1) [7.7]                                              | 3 (2.2) [3.3]                                             |
| Upper respiratory tract infection              | 33 (4.8) [7.3]                                              | 5 (3.7) [5.5]                                             |
| Oral candidiasis <sup>d</sup>                  | 33 (4.8) [7.3]                                              | 1 (0.7) [1.1]                                             |
| Headache                                       | 24 (3.5) [5.3]                                              | 5 (3.7) [5.5]                                             |
| Diarrhoea                                      | 23 (3.4) [5.0]                                              | 2 (1.5) [2.2]                                             |
| Hypertension                                   | 18 (2.6) [3.9]                                              | 5 (3.7) [5.5]                                             |
| ALT elevation                                  | 14 (2.0) [3.0]                                              | 4 (2.9) [4.4]                                             |
| AST elevation                                  | 13 (1.9) [2.8]                                              | 3 (2.2) [3.2]                                             |
| Injection site erythema                        | 6 (0.9) [1.3]                                               | 6 (4.4) [6.6]                                             |
| Uveitis                                        | 0                                                           | 0                                                         |
| Adjudicated MACE                               | 4 (0.6) [0.9]                                               | 0                                                         |
| Neutropenia                                    | 7 (1.0) [1.5]                                               | 1 (0.7) [1.1]                                             |
| Infections                                     |                                                             |                                                           |
| Serious                                        | 5 (0.7) [1.1] <sup>e</sup>                                  | 2 (1.5) [2.2] <sup>e</sup>                                |
| Opportunistic                                  | 9 (1.3) [2.0]                                               | 0                                                         |
| Active TB                                      | 0                                                           | 0                                                         |
| Hypersensitivity                               | 44 (6.4) [9.8]                                              | 4 (2.9) [4.4]                                             |
| Injection site reactions                       | 11 (1.6) [2.4]                                              | 9 (6.6) [10.2]                                            |
| Adjudicated SIB                                | 0                                                           | 0                                                         |
| Liver function test changes/enzyme elevations  |                                                             |                                                           |
| ALT >3 × ULN                                   | 10 (1.5) <sup>f</sup>                                       | 5 (3.7)                                                   |
| AST or ALT >3 × ULN                            | 19 (2.8) <sup>f</sup>                                       | 6 (4.4)                                                   |
| Definite adjudicated IBD                       | 2 (0.3) <sup>g</sup>                                        | 0                                                         |
| Malignancies excluding nonmelanoma skin cancer |                                                             |                                                           |

| Week 16–52, n (%) [EAIR/100 PY]       |                                                             |                                                           |
|---------------------------------------|-------------------------------------------------------------|-----------------------------------------------------------|
|                                       | BKZ 160 mg Q4W Total<br>N=685 <sup>a</sup><br>(PYAR: 467.0) | Reference Arm<br>(ADA 40 mg Q2W)<br>N=136<br>(PYAR: 93.1) |
| Colon cancer                          | 1 (0.1) [0.2]                                               | 0                                                         |
| Chronic lymphocytic leukaemia stage 0 | 1 (0.1) [0.2]                                               | 0                                                         |
| Papillary thyroid cancer              | 1 (0.1) [0.2]                                               | 0                                                         |
| Nonmelanoma skin cancer               |                                                             |                                                           |
| Squamous cell carcinoma               | 1 (0.1) [0.2]                                               | 0                                                         |
| Basal cell carcinoma                  | 2 (0.3) [0.4]                                               | 0                                                         |

1 Active treatment-blind set. [a] Includes patients who switched from placebo to BKZ; [b] Motorcycle  
2 accident; [c] Most frequent adverse events are those occurring in  $\geq 5\%$  of patients in any study arm up  
3 to Week 52; [d] All infections were mild or moderate and none were serious, 1 BKZ-treated patient  
4 discontinued; [e] 5 serious infections reported on the BKZ treatment arm: 1 cellulitis, 1 gangrene, 1  
5 upper respiratory tract infection, 1 cystitis and 1 urinary tract infection. 2 ADA-treated patients reported  
6 serious infections: 1 otitis media and 1 reported both herpes zoster and atypical pneumonia; [f] Data  
7 missing for 6 patients; [g] Both ulcerative colitis; one in a patient with a prior history of IBD, the other  
8 de novo. ADA: adalimumab; ALT: alanine aminotransferase; AST: aspartate aminotransferase;  
9 BKZ: bimekizumab; EAIR: exposure-adjusted incident rate; IBD: inflammatory bowel disease;  
10 MACE: major adverse cardiovascular event; PYAR: patient-years at risk; Q2W: every two weeks;  
11 Q4W: every four weeks; SIB: suicidal ideation and behaviour; TB: tuberculosis;  
12 TEAE: treatment-emergent adverse event; ULN: upper limit of normal.  
13

1 **Supplementary Table 5. ACR responders to Week 52**2 **A) ACR20 (%)**

|         | PBO/BKZ<br>160 mg Q4W<br>N=281 |      | BKZ 160 mg Q4W<br>N=431 |      | Reference arm<br>(ADA 40 mg Q2W)<br>N=140 |      |
|---------|--------------------------------|------|-------------------------|------|-------------------------------------------|------|
|         | NRI                            | OC   | NRI                     | OC   | NRI                                       | OC   |
| Week 2  | 7.8                            | 8.0  | 27.1                    | 27.6 | 33.6                                      | 34.6 |
| Week 4  | 13.2                           | 13.6 | 42.2                    | 42.9 | 45.0                                      | 45.7 |
| Week 8  | 17.8                           | 18.9 | 56.6                    | 58.7 | 58.6                                      | 60.3 |
| Week 12 | 26.7                           | 28.3 | 56.1                    | 58.2 | 60.7                                      | 63.9 |
| Week 16 | 23.8                           | 25.2 | 62.2                    | 64.9 | 68.6                                      | 71.1 |
| Week 20 | 58.0                           | 62.7 | 66.8                    | 72.5 | 68.6                                      | 72.2 |
| Week 24 | 62.3                           | 67.3 | 65.4                    | 72.9 | 70.7                                      | 75.0 |
| Week 28 | 64.4                           | 72.4 | 68.4                    | 76.4 | 68.6                                      | 78.0 |
| Week 32 | 64.4                           | 72.1 | 68.0                    | 75.7 | 66.4                                      | 74.4 |
| Week 36 | 68.3                           | 74.1 | 67.3                    | 76.1 | 67.9                                      | 76.6 |
| Week 44 | 69.8                           | 79.0 | 70.8                    | 80.9 | 66.4                                      | 80.2 |
| Week 52 | 68.0                           | 76.1 | 71.2                    | 80.8 | 72.9                                      | 82.9 |

3



1 **B) ACR50<sup>a</sup> (%)**

|         | PBO/BKZ<br>160 mg Q4W<br>N=281 |      | BKZ 160 mg Q4W<br>N=431 |      | Reference arm<br>(ADA 40 mg Q2W)<br>N=140 |      |
|---------|--------------------------------|------|-------------------------|------|-------------------------------------------|------|
|         | NRI                            | OC   | NRI                     | OC   | NRI                                       | OC   |
| Week 2  | 1.8                            | 1.8  | 7.7                     | 7.8  | 13.6                                      | 14.0 |
| Week 4  | 3.2                            | 3.3  | 17.6                    | 17.9 | 21.4                                      | 21.7 |
| Week 8  | 5.7                            | 6.0  | 33.9                    | 34.9 | 33.6                                      | 34.6 |
| Week 12 | 7.1                            | 7.5  | 37.4                    | 38.9 | 35.0                                      | 36.8 |
| Week 16 | 10.0                           | 10.5 | 43.9                    | 45.7 | 45.7                                      | 47.4 |
| Week 20 | 31.3                           | 33.8 | 47.1                    | 51.4 | 45.7                                      | 48.1 |
| Week 24 | 35.9                           | 38.8 | 45.5                    | 50.4 | 47.1                                      | 50.0 |
| Week 28 | 43.8                           | 48.4 | 49.0                    | 54.7 | 50.0                                      | 56.9 |
| Week 32 | 45.6                           | 50.6 | 52.4                    | 58.5 | 49.3                                      | 55.2 |
| Week 36 | 49.5                           | 53.9 | 50.8                    | 57.3 | 47.9                                      | 54.0 |
| Week 44 | 51.2                           | 57.8 | 53.4                    | 60.8 | 44.3                                      | 53.4 |
| Week 52 | 53.0                           | 59.1 | 54.5                    | 61.8 | 50.0                                      | 56.9 |

2

1 **C) ACR70 (%)**

|         | PBO/BKZ<br>160 mg Q4W<br>N=281 |      | BKZ 160 mg Q4W<br>N=431 |      | Reference arm<br>(ADA 40 mg Q2W)<br>N=140 |      |
|---------|--------------------------------|------|-------------------------|------|-------------------------------------------|------|
|         | NRI                            | OC   | NRI                     | OC   | NRI                                       | OC   |
| Week 2  | 0.7                            | 0.7  | 2.3                     | 2.3  | 2.9                                       | 2.9  |
| Week 4  | 0.4                            | 0.4  | 6.3                     | 6.4  | 5.7                                       | 5.8  |
| Week 8  | 1.1                            | 1.1  | 14.6                    | 15.1 | 16.4                                      | 16.9 |
| Week 12 | 2.8                            | 3.0  | 21.3                    | 22.1 | 22.1                                      | 23.3 |
| Week 16 | 4.3                            | 4.5  | 24.4                    | 25.2 | 27.9                                      | 28.9 |
| Week 20 | 13.5                           | 14.6 | 29.0                    | 31.6 | 28.6                                      | 30.1 |
| Week 24 | 18.9                           | 20.4 | 29.2                    | 32.4 | 30.0                                      | 31.6 |
| Week 28 | 22.4                           | 24.9 | 32.9                    | 36.8 | 30.7                                      | 34.7 |
| Week 32 | 26.0                           | 28.9 | 36.2                    | 40.3 | 33.6                                      | 37.3 |
| Week 36 | 28.5                           | 30.9 | 36.7                    | 41.4 | 31.4                                      | 35.5 |
| Week 44 | 35.9                           | 40.4 | 38.5                    | 43.8 | 34.3                                      | 41.0 |
| Week 52 | 35.9                           | 39.9 | 39.2                    | 44.6 | 37.9                                      | 43.1 |

2 Randomised set. The study was not powered for statistical comparisons of ADA to BKZ or PBO.  
3 [a] ACR50 at Week 16 was the primary endpoint. ACR20/50/70: American College of Rheumatology  
4 ≥20%/50%/70% response criteria; ADA: adalimumab; BKZ: bimekizumab; NRI: non-responder  
5 imputation; OC: observed case; PBO: placebo; Q2W: every 2 weeks; Q4W: every 4 weeks.

1 **Supplementary Table 6. PASI responders to Week 52 (%)**2 **A) PASI75 (%)**

|         | PBO/BKZ<br>160 mg Q4W<br>N=140 |      | BKZ 160 mg Q4W<br>N=217 |      | Reference arm<br>(ADA 40 mg Q2W)<br>N=68 |      |
|---------|--------------------------------|------|-------------------------|------|------------------------------------------|------|
|         | NRI                            | OC   | NRI                     | OC   | NRI                                      | OC   |
| Week 2  | 4.3                            | 4.4  | 19.8                    | 20.6 | 11.8                                     | 12.1 |
| Week 4  | 5.0                            | 5.1  | 47.5                    | 48.8 | 17.6                                     | 17.6 |
| Week 8  | 7.9                            | 8.3  | 69.6                    | 72.6 | 42.6                                     | 43.3 |
| Week 12 | 10.0                           | 10.6 | 77.0                    | 80.7 | 52.9                                     | 57.1 |
| Week 16 | 12.9                           | 13.7 | 77.4                    | 81.2 | 66.2                                     | 69.2 |
| Week 20 | 60.0                           | 65.6 | 79.7                    | 86.1 | 61.8                                     | 65.6 |
| Week 24 | 75.7                           | 79.1 | 81.1                    | 89.8 | 58.8                                     | 63.5 |
| Week 36 | 85.7                           | 90.2 | 81.1                    | 90.7 | 66.2                                     | 73.8 |
| Week 52 | 85.0                           | 92.2 | 81.6                    | 93.7 | 66.2                                     | 75.0 |

3

1 **B) PASI90<sup>a</sup> (%)**

|         | PBO/BKZ<br>160 mg Q4W<br>N=140 |      | BKZ 160 mg Q4W<br>N=217 |      | Reference arm<br>(ADA 40 mg Q2W)<br>N=68 |      |
|---------|--------------------------------|------|-------------------------|------|------------------------------------------|------|
|         | NRI                            | OC   | NRI                     | OC   | NRI                                      | OC   |
| Week 2  | 1.4                            | 1.5  | 5.1                     | 5.3  | 2.9                                      | 3.0  |
| Week 4  | 4.3                            | 4.3  | 19.8                    | 20.4 | 7.4                                      | 7.4  |
| Week 8  | 4.3                            | 4.5  | 47.9                    | 50.0 | 26.5                                     | 26.9 |
| Week 12 | 4.3                            | 4.5  | 57.6                    | 60.4 | 30.9                                     | 33.3 |
| Week 16 | 2.9                            | 3.1  | 61.3                    | 64.3 | 41.2                                     | 43.1 |
| Week 20 | 35.7                           | 39.1 | 68.2                    | 73.6 | 44.1                                     | 46.9 |
| Week 24 | 61.4                           | 64.2 | 72.8                    | 80.6 | 47.1                                     | 50.8 |
| Week 36 | 75.7                           | 79.7 | 74.2                    | 83.0 | 54.4                                     | 60.7 |
| Week 52 | 75.7                           | 82.2 | 71.4                    | 82.0 | 60.3                                     | 68.3 |

2

1 **C) PASI100 (%)**

|         | PBO/BKZ<br>160 mg Q4W<br>N=140 |      | BKZ 160 mg Q4W<br>N=217 |      | Reference arm<br>(ADA 40 mg Q2W)<br>N=68 |      |
|---------|--------------------------------|------|-------------------------|------|------------------------------------------|------|
|         | NRI                            | OC   | NRI                     | OC   | NRI                                      | OC   |
| Week 2  | 0.7                            | 0.7  | 4.1                     | 4.3  | 0.0                                      | 0.0  |
| Week 4  | 4.3                            | 4.3  | 12.9                    | 13.3 | 4.4                                      | 4.4  |
| Week 8  | 2.1                            | 2.3  | 29.5                    | 30.8 | 19.1                                     | 19.4 |
| Week 12 | 2.9                            | 3.0  | 41.9                    | 44.0 | 23.5                                     | 25.4 |
| Week 16 | 2.1                            | 2.3  | 47.5                    | 49.8 | 20.6                                     | 21.5 |
| Week 20 | 20.0                           | 21.9 | 55.3                    | 59.7 | 29.4                                     | 31.3 |
| Week 24 | 42.9                           | 44.8 | 56.2                    | 62.2 | 38.2                                     | 41.3 |
| Week 36 | 64.3                           | 67.7 | 59.4                    | 66.5 | 33.8                                     | 37.7 |
| Week 52 | 65.0                           | 70.5 | 60.8                    | 69.8 | 48.5                                     | 55.0 |

2 Randomised set, in patients with psoriasis affecting  $\geq 3\%$  BSA at baseline. The study was not powered  
3 for statistical comparisons of ADA to BKZ or PBO. [a] PASI90 was a ranked secondary endpoint.  
4 ADA: adalimumab; BKZ: bimekizumab; BSA: body surface area; NRI: non-responder imputation;  
5 OC: observed case; PASI75/90/100: Psoriasis Area and Severity Index  $\geq 75\%/90\%/100\%$  improvement;  
6 PBO: placebo; Q2W: every 2 weeks; Q4W: every 4 weeks.

7

1 **Supplementary Table 7. Additional efficacy endpoints (%)**2 **A) MDA<sup>a</sup> (%)**

|         | PBO/BKZ<br>160 mg Q4W<br>N=281 |      | BKZ 160 mg Q4W<br>N=431 |      | Reference arm<br>(ADA 40 mg Q2W)<br>N=140 |      |
|---------|--------------------------------|------|-------------------------|------|-------------------------------------------|------|
|         | NRI                            | OC   | NRI                     | OC   | NRI                                       | OC   |
| Week 0  | 1.8                            | 1.8  | 3.2                     | 3.3  | 0.7                                       | 0.7  |
| Week 4  | 6.8                            | 6.9  | 23.4                    | 23.8 | 17.1                                      | 17.4 |
| Week 8  | 8.9                            | 9.4  | 32.3                    | 33.3 | 32.9                                      | 33.8 |
| Week 12 | 10.3                           | 11.0 | 41.5                    | 43.1 | 40.7                                      | 42.9 |
| Week 16 | 13.2                           | 14.0 | 45.0                    | 46.5 | 45.0                                      | 46.7 |
| Week 20 | 28.5                           | 30.8 | 47.3                    | 51.3 | 43.6                                      | 45.9 |
| Week 24 | 37.7                           | 40.8 | 48.5                    | 53.5 | 47.9                                      | 51.1 |
| Week 36 | 46.3                           | 50.4 | 51.7                    | 58.4 | 46.4                                      | 52.0 |
| Week 52 | 53.7                           | 59.7 | 55.0                    | 62.4 | 52.9                                      | 60.2 |

3

1 **B) VLDA (%)**

|         | PBO/BKZ<br>160 mg Q4W<br>N=281 |      | BKZ 160 mg Q4W<br>N=431 |      | Reference arm<br>(ADA 40 mg Q2W)<br>N=140 |      |
|---------|--------------------------------|------|-------------------------|------|-------------------------------------------|------|
|         | NRI                            | OC   | NRI                     | OC   | NRI                                       | OC   |
| Week 0  | 0.0                            | 0.0  | 0.0                     | 0.0  | 0.0                                       | 0.0  |
| Week 4  | 0.4                            | 0.4  | 5.3                     | 5.4  | 3.6                                       | 3.6  |
| Week 8  | 0.7                            | 0.8  | 8.1                     | 8.4  | 8.6                                       | 8.8  |
| Week 12 | 2.5                            | 2.6  | 12.8                    | 13.2 | 13.6                                      | 14.3 |
| Week 16 | 1.1                            | 1.1  | 14.6                    | 15.1 | 15.7                                      | 16.3 |
| Week 20 | 6.4                            | 6.9  | 20.9                    | 22.6 | 18.6                                      | 19.5 |
| Week 24 | 11.7                           | 12.7 | 22.3                    | 24.7 | 20.0                                      | 21.1 |
| Week 36 | 19.2                           | 20.8 | 26.9                    | 30.3 | 22.1                                      | 25.2 |
| Week 52 | 22.1                           | 24.6 | 29.0                    | 32.9 | 27.9                                      | 32.0 |

2

1 **C) ACR50+PASI100<sup>b</sup> (%)**

|         | PBO/BKZ<br>160 mg Q4W<br>N=140 |      | BKZ 160 mg Q4W<br>N=217 |      | Reference arm<br>(ADA 40 mg Q2W)<br>N=68 |      |
|---------|--------------------------------|------|-------------------------|------|------------------------------------------|------|
|         | NRI                            | OC   | NRI                     | OC   | NRI                                      | OC   |
| Week 2  | 0.0                            | 0.0  | 0.0                     | 0.0  | 0.0                                      | 0.0  |
| Week 4  | 0.0                            | 0.0  | 5.5                     | 5.6  | 0.0                                      | 0.0  |
| Week 8  | 0.7                            | 0.7  | 14.7                    | 15.2 | 5.9                                      | 6.0  |
| Week 12 | 0.0                            | 0.0  | 23.0                    | 23.9 | 16.2                                     | 17.5 |
| Week 16 | 0.0                            | 0.0  | 27.6                    | 29.0 | 16.2                                     | 16.9 |
| Week 20 | 11.4                           | 12.5 | 33.6                    | 36.5 | 22.1                                     | 23.4 |
| Week 24 | 22.9                           | 23.9 | 31.3                    | 34.7 | 25.0                                     | 27.0 |
| Week 36 | 40.7                           | 42.9 | 42.4                    | 47.7 | 27.9                                     | 31.1 |
| Week 52 | 46.4                           | 50.4 | 47.0                    | 53.1 | 35.3                                     | 40.0 |

2 Randomised set. The study was not powered for statistical comparisons of ADA to BKZ or PBO. [a] MDA  
3 was a ranked secondary endpoint; [b] In patients with psoriasis affecting  $\geq 3\%$  BSA at baseline;  
4 PBO/BKZ: n=140; BKZ: n=217; ADA: n=68. ACR50: American College of Rheumatology  $\geq 50\%$  response  
5 criteria; ADA: adalimumab; BKZ: bimekizumab; BSA: body surface area; MDA: minimal disease activity;  
6 NRI: non-responder imputation; OC: observed case; PASI100: Psoriasis Area and Severity Index 100%  
7 improvement; PBO: placebo; Q2W: every 2 weeks; Q4W: every 4 weeks; VLDA: very low disease  
8 activity.



## 1 Supplementary Figure 1. Study design

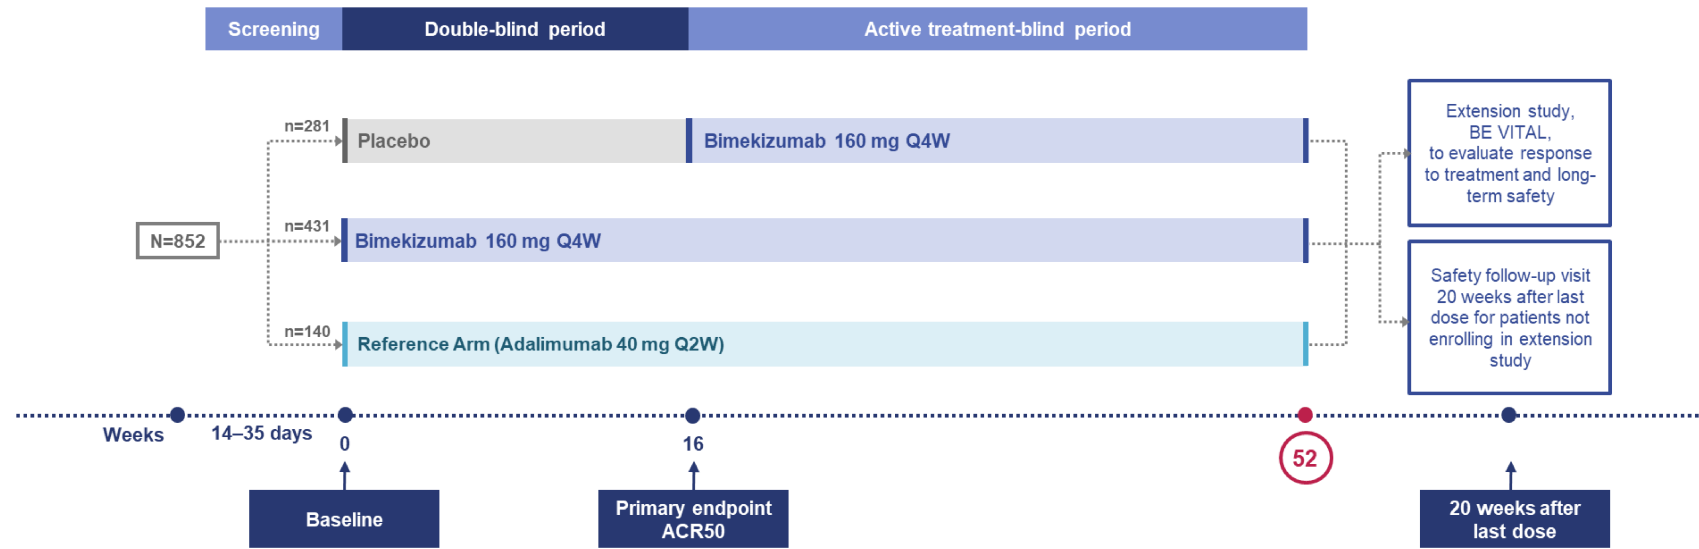

2

3 Randomised set. BKZ-treated patients eligible to receive rescue therapy from Week 16 at the discretion of the investigator, while continuing to receive BKZ. ACR50: American  
 4 College of Rheumatology 50% response criteria; BKZ: bimekizumab; Q2W: every 2 weeks; Q4W: every 4 weeks.

5

6

1 **Supplementary Figure 2. Radiographic inhibition outcomes [OC]**2 (A) Proportion of patients with no radiographic progression (vdHmTSS CfB  $\leq 0.5$ ) at Week 16 and Week 52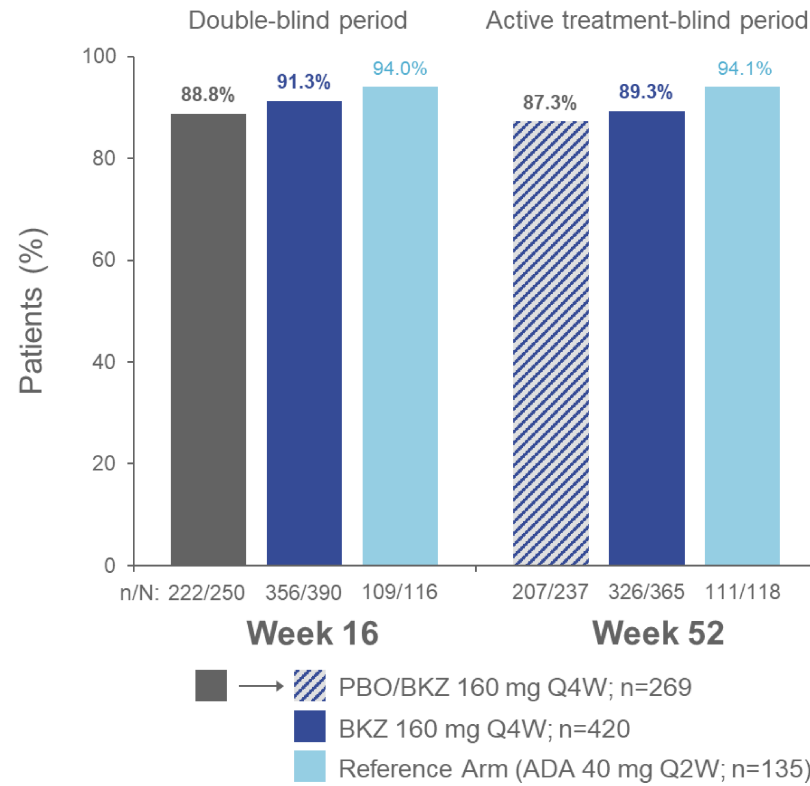

3

## 1 (B) Cumulative probability plots of vdHmTSS Cfb to Week 16 and Week 16–52

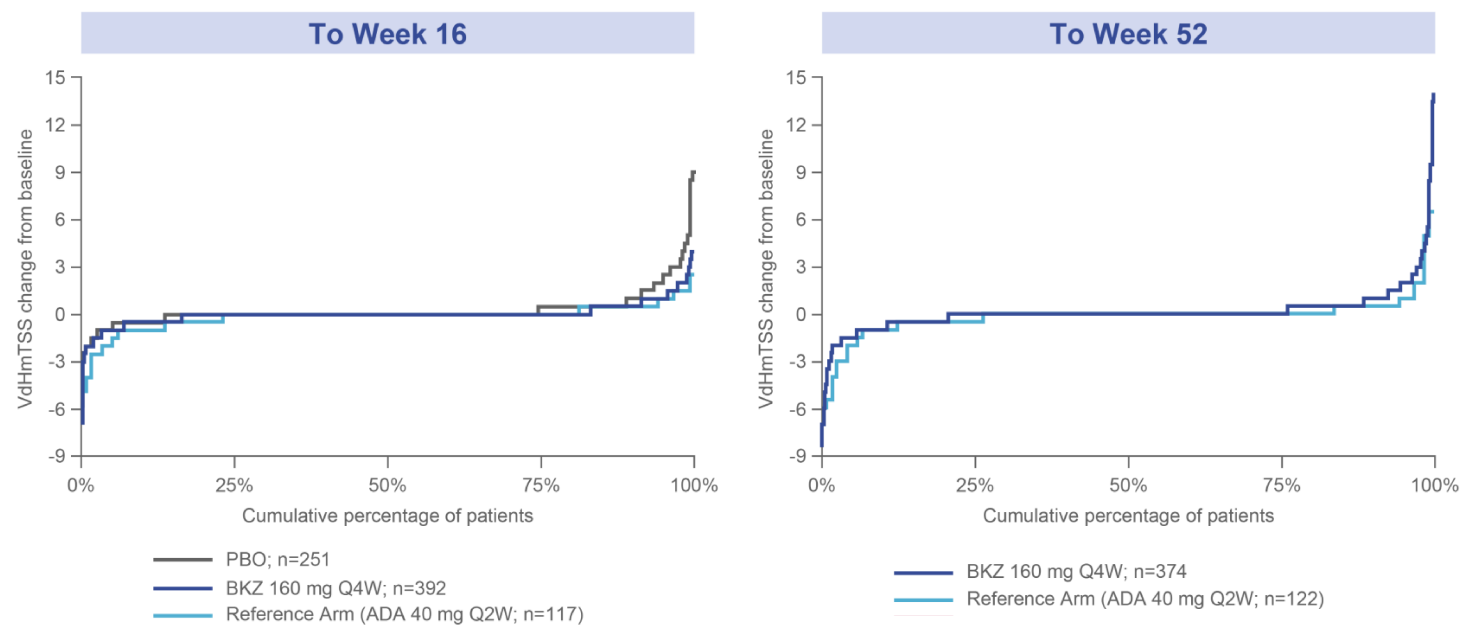

2

3 Radiographic set (patients who received  $\geq 1$  study drug dose and had valid radiographs of hands and feet, assessed by  $\geq 2$  reviewers, at screening). Observed case data  
 4 reported. Cumulative probability in each dose group in the range of 0–100%. Lower vdHmTSS scores indicate more inhibition achieved. [a] Includes patients randomised to  
 5 PBO at baseline who switched to BKZ at Week 16. ADA: adalimumab; BKZ: bimekizumab; Cfb: change from baseline; OC: observed case; PBO: placebo; Q2W: every two  
 6 weeks; Q4W: every 4 weeks; vdHmTSS: van der Heijde modified Total Sharp Score.

7
